# Supplementary material for: Cytoarchitectonic Analysis and 3D Maps of the Mesial Piriform Region in the Human Brain
Source: MDPI journal article supplement (doi:10.3390/anatomia3020007), 2024-04-07
Supplement: s1 [file s1]

Supplementary Materials:

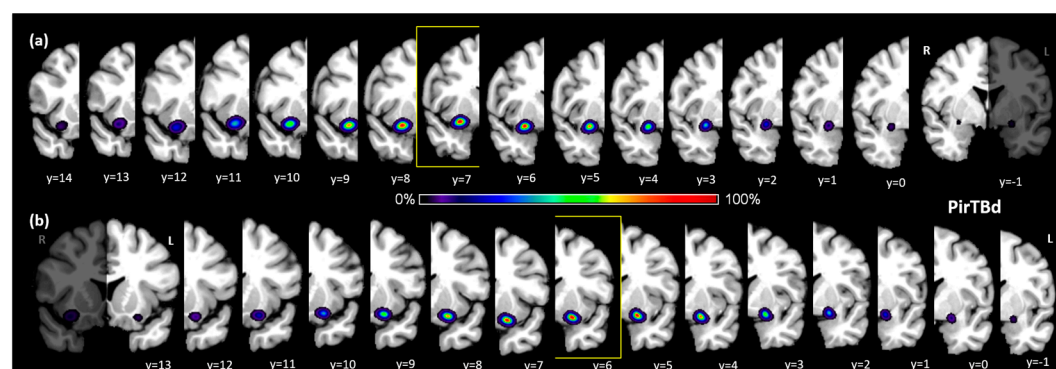

**Figure S1.** Probabilistic map of PirTBd throughout its rostro-caudal extent in the MNI Colin 27 reference space: (a) In the right; (b) In the left hemisphere. Section with the center of mass y-coordinate is framed in the right ( $y=7$ ) and left ( $y=6$ ) hemisphere. Color bar reflects a probability of the area in a particular voxel of the section. L—left hemisphere, R—right hemisphere

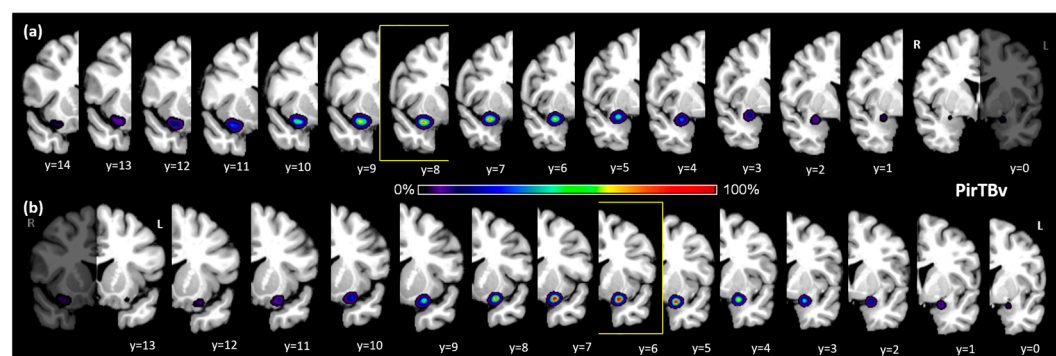

**Figure S2.** Probabilistic map of PirTBv its rostro-caudal extent in of the MNI Colin 27 reference space: (a) In the right; (b) In the left hemisphere. Section with the center of mass y-coordinate is framed in the right ( $y=8$ ) and left ( $y=6$ ) hemisphere. Color bar reflects a probability of the area in a particular voxel of the section. L—left hemisphere, R—right hemisphere.

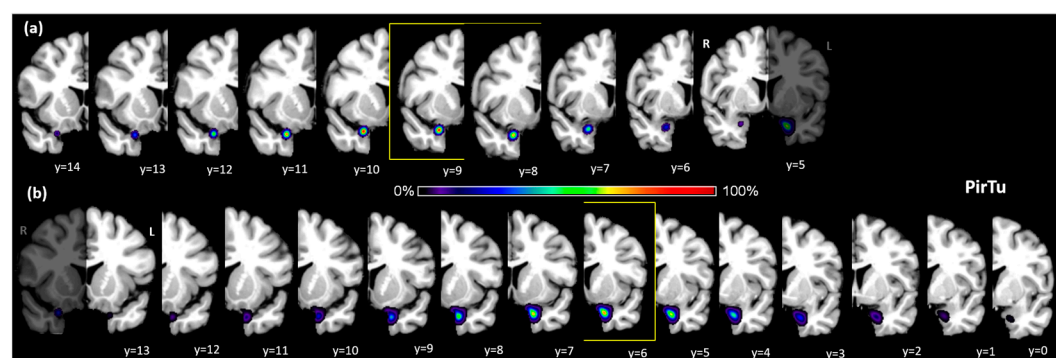

**Figure S3.** Probabilistic map of PirTu throughout its rostro-caudal extent of the MNI Colin 27 reference space: (a) In the right; (b) In the left hemisphere. Section with the center of mass y-coordinate is framed in the right ( $y=9$ ) and left ( $y=6$ ) hemisphere. Color bar reflects a probability of the area in a particular voxel of the section. L—left hemisphere, R—right hemisphere.

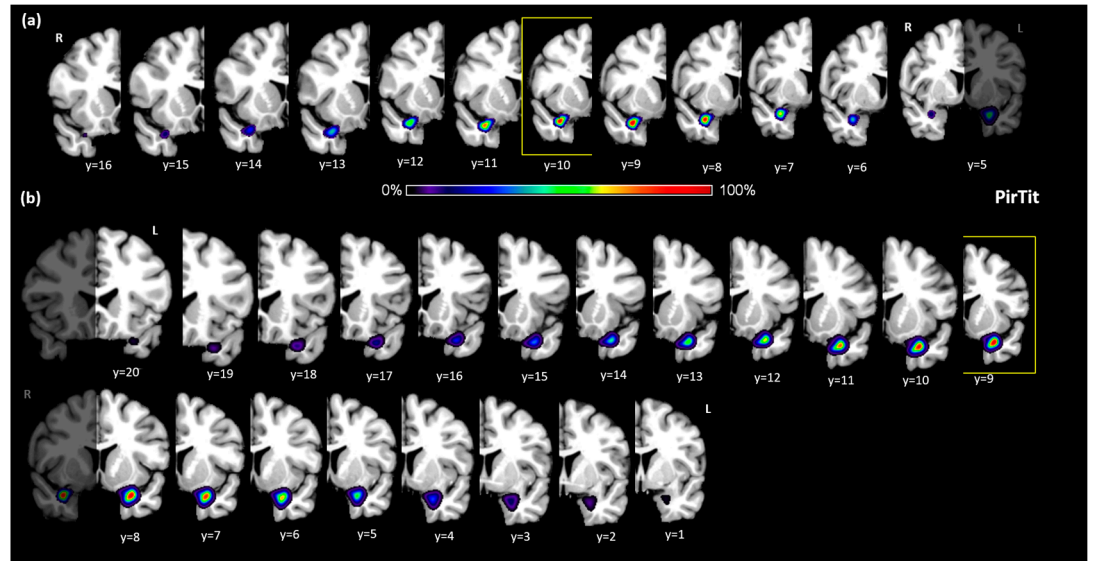

**Figure S4.** Probabilistic map of PirTit throughout its rostro-caudal extent in of the MNI Colin 27 reference space: (a) In the right; (b) In the left hemisphere. Section with the center of mass y-coordinate is framed in the right (y=10) and left (y=9) hemisphere. Color bar reflects a probability of the area in a particular voxel of the section. L—left hemisphere, R—right hemisphere.

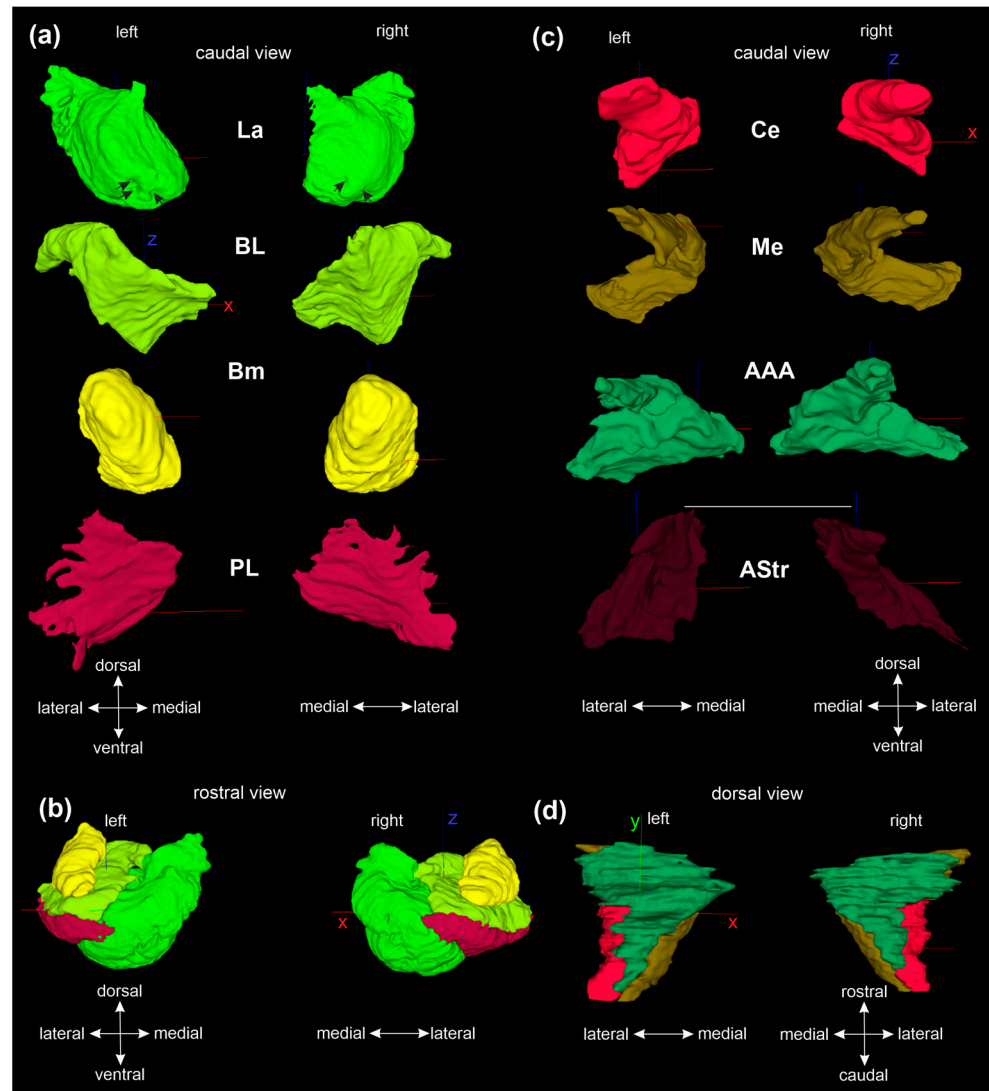

**Figure S5.** 3D reconstructions of the amygdala in the BigBrain in both hemispheres: **(a)** Subdivisions of the laterobasal amygdala; **(b)** The entire laterobasal group; **(c)** Subdivisions of the centromedial amygdala and the amygdalostriatal transition zone; **(d)** The entire centromedial group. Subdivisions in the groups have the same colors as in **(a)** and **(c)**. Stereotaxic x (red), y (green) and z coordinates (blue). Arrows in lateral nucleus (La) indicate recesses on the surface, associated with places of contact with the granular part of the paralaminar nucleus. Abbreviations in **(a)** (from top to bottom): La—lateral nucleus, BL—basolateral nucleus, Bm—basomedial nucleus, PL—paralaminar nucleus; Abbreviations in **(c)** (from top to bottom): Ce—central nucleus, Me—medial nucleus, AAA—anterior amygdaloid area; AStr—amygdalostriatal transition zone.

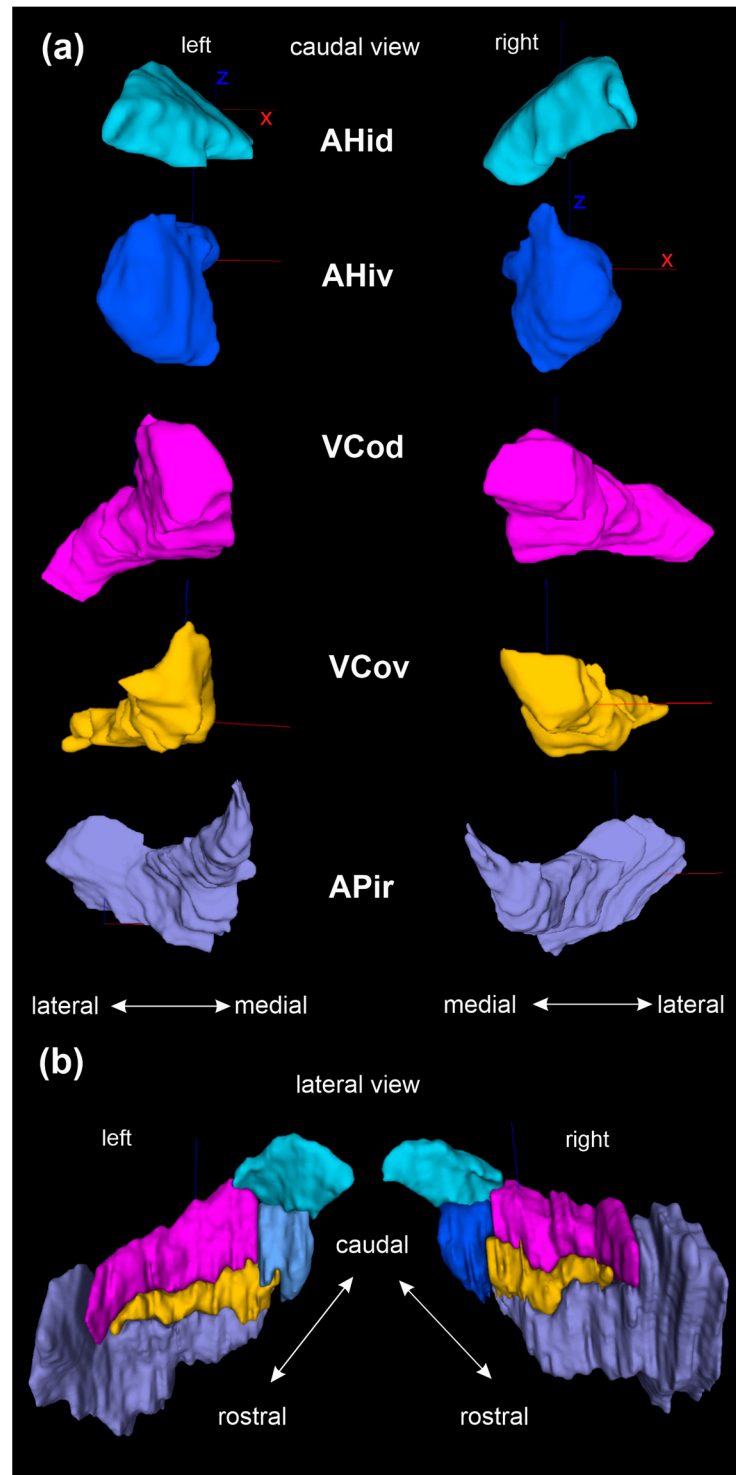

**Figure S6.** 3D reconstructions of the amygdala in the BigBrain in both hemispheres: **(a)** Subdivisions of the superficial amygdala; **(b)** The entire superficial group. Subdivisions within the groups have the respective colors as in (a). Stereotaxic x (red), y (green) and z coordinates (blue). Abbreviations (from top to bottom): AHid — amygdalohippocampal transition area, dorsal part; AHiv — amygdalohippocampal transition area, ventral part; VCod — ventral cortical nucleus, dorsal part; VCov — ventral cortical nucleus, ventral part; APir — amygdalopiriform transition area.

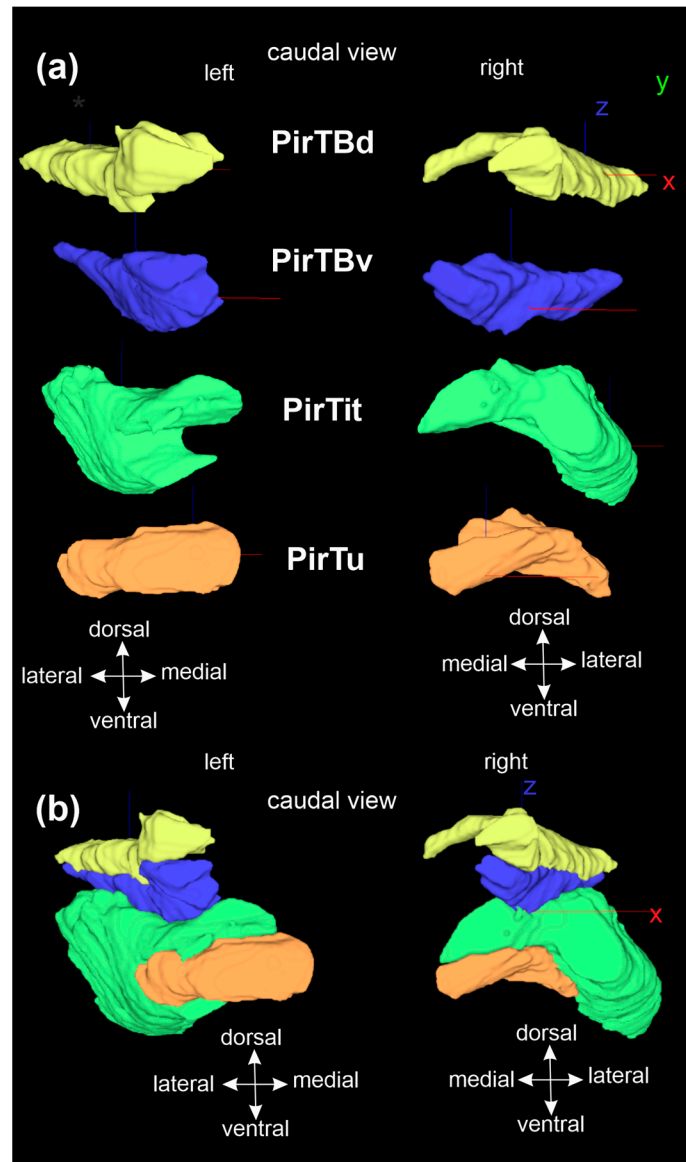

**Figure S7.** 3D reconstructions of the mesial piriform cortex in the BigBrain in both hemispheres: **(a)** Subdivisions, and **(b)** The entire region. Subdivisions within the region have the respective colors as in (a). Stereotaxic x (red), y (green) and z coordinates (blue). Abbreviations in (a): PirTBd—piriform temporobasal area, dorsal part, PirTBv—piriform temporobasal area, ventral part, PirTit—piriform temporal area (Incisura temporalis), PirTu—piriform temporal area (uncus).

**Table S1.** The Initial Eigenvalues and Extraction Sums for first three factors (IF1-IF3) out of 21 at the initial point of analysis.

| IF | Initial Eigenvalues |               |              | Extraction Sums of Squared IF Loadings |               |              | Kruskal-Wallis Test |
|----|---------------------|---------------|--------------|----------------------------------------|---------------|--------------|---------------------|
|    | Total               | % of variance | Cumulative % | Total                                  | % of variance | Cumulative % | P value             |
| 1  | 11.433              | 54.442        | 54.442       | 11.433                                 | 54.442        | 54.442       | < 0.001             |
| 2  | 6.351               | 30.245        | 84.687       | 6.351                                  | 30.245        | 84.687       | < 0.001             |
| 3  | 1.253               | 5.966         | 90.653       | 1.253                                  | 5.966         | 90.653       | < 0.001             |

\* Extraction Sums of Squared Loadings represent eigenvalues (greater than 1) associated with these factors extracted in the analysis (that results in 3 factors).

**Table S2.** Relation of modified Haralick's features to first three factors derived in PCA

| Modified Haralick's features     | IF1   | IF2   | IF3   |
|----------------------------------|-------|-------|-------|
| Homogeneity                      | 0.994 |       |       |
| InverseDifference                | 0.992 |       |       |
| DifferenceAverage                | 0.991 |       |       |
| Dissimilarity                    | 0.990 |       |       |
| Correlation                      | 0.975 |       |       |
| InformationMeasureOfCorrelation2 | 0.974 |       |       |
| DifferenceEntropy                | 0.970 |       |       |
| DifferenceVariance               | 0.963 |       |       |
| Contrast                         | 0.959 |       |       |
| MaximalCorrelationCoefficient    | 0.954 |       |       |
| Entropy                          | 0.872 |       | 0.321 |
| InformationMeasureOfCorrelation1 | 0.737 |       | 0.402 |
| sumVariance                      |       | 0.986 |       |
| clusterProminence                |       | 0.967 |       |
| autoCorrelation                  |       | 0.959 |       |
| sumOfSquaresVariance             |       | 0.953 |       |
| clusterShade                     |       | 0.945 |       |
| sumAverage                       |       | 0.933 |       |
| sumEntropy                       |       | 0.816 |       |
| Energy                           | 0.509 |       | 0.705 |
| MaximumProbability               | 0.523 |       | 0.564 |

\* The features are arranged in the order to present the highest values for the IF1 and IF2– most important contributors to the factors – in the upper rows. The table present only values which are higher than 0.3.

**Probabilistic maps (datasets):**

<https://www.ebrains.eu/tools/human-brain-atlas>

**In addition, data for each structure can be found at:**

**Piriform region**

Probabilistic cytoarchitectonic map of the area piriformis temporalis. (JBA - PM Area PirT)

<https://search.kg.ebrains.eu/live/a04a3178-c247-4a55-bb4c-eb985e1c1e8a>

Probabilistic cytoarchitectonic map of the area piriformis temporalis, incisura temporalis. (JBA - PM Area PirT.Tit)

<https://search.kg.ebrains.eu/live/088a8f2d-1a54-403d-abd3-d805a9d797f2>

Probabilistic cytoarchitectonic map of the area piriformis temporalis, uncus. (JBA - PM Area PirT.Tu)

<https://search.kg.ebrains.eu/live/f425afb1-5eb5-4f07-8782-dac156efc377>

Probabilistic cytoarchitectonic map of the area piriformis temporobasalis. (JBA - PM Area PirTB)

<https://search.kg.ebrains.eu/live/dd2858a9-6565-4a27-b8fa-34776cb51a12>

Probabilistic cytoarchitectonic map of the area piriformis temporobasalis dorsalis. (JBA - PM Area PirTB.TBd)

<https://search.kg.ebrains.eu/live/fb438a0a-6086-4507-97c6-fbc23e4afba0>

Probabilistic cytoarchitectonic map of the area piriformis temporobasalis ventralis. (JBA - PM Area PirTB.TBv)

<https://search.kg.ebrains.eu/live/bf11f1b2-4acc-4b87-95e9-496e40f9bbe4>

## Amygdala

Probabilistic cytoarchitectonic map of the amygdalostriatal transition zone. (JBA - PM Astr)

<https://search.kg.ebrains.eu/live/4ee5aee4-0513-4b07-937b-6331e80406dc>

Probabilistic map of the anterior amygdaloid area of the centromedial amygdala (CM.AAA) (v8.2):

<https://search.kg.ebrains.eu/instances/12486b41-bab0-466f-af94-5d3783bd4f40>

Probabilistic map of the central nucleus of the centromedial amygdala (CM.Ce) (v8.2): <https://search.kg.ebrains.eu/instances/f2e7363d-569c-4e67-87b1-5096482eb5f5>

Probabilistic map of the medial nucleus of the centromedial amygdala (CM.Me) (v8.2): <https://search.kg.ebrains.eu/instances/13aab904-dfe7-4ee8-bdef-5db052c388f7>

Probabilistic map of the amygdalohippocampal transition area of the superficial amygdaloid group (SF.AHi) (v8.2):

<https://search.kg.ebrains.eu/instances/b462bbf2-565b-4690-a03a-81bc4941da65>

Probabilistic map of the amygdalopiriform transition area of the superficial amygdaloid group (SF.APir) (v8.2):

<https://search.kg.ebrains.eu/instances/bcd9e8cb-9e63-49a2-b898-299fa01a5928>

Probabilistic map of the ventral cortical nucleus of the superficial amygdaloid group (SF.VCo) (v8.2):

<https://search.kg.ebrains.eu/instances/0fa40afa-414e-43c7-8886-b0f9f5e943e0>

Probabilistic map of the basolateral nucleus of the laterobasal group (LB.BI) (v8.2): <https://search.kg.ebrains.eu/instances/3cc375a3-be11-4358-bd9a-d35a8c00b80a>



Probabilistic map of the basomedial nucleus of the laterobasal group (LB.Bm) (v8.2): <https://search.kg.ebrains.eu/instances/d164fe58-6bee-45ca-886a-40640c4ba576>

Probabilistic map of the lateral nucleus of the laterobasal group (LB.La) (v8.2): <https://search.kg.ebrains.eu/instances/203b7c29-29ab-40d0-bc52-0bd2c4eb1c4c>

Probabilistic map of the paralaminar nucleus of the laterobasal group (LB.Pl) (v8.2): <https://search.kg.ebrains.eu/instances/e7b906ec-7eb0-4c16-b669-83f2d13a71c1>

Probabilistic map of the intermediate central fiber masses of the internal intermediate fiber masses of the amygdala (IF.ice) (v8.2): <https://search.kg.ebrains.eu/instances/e7b4da43-1e2d-43c0-ad62-e25b6aff6bff>

Probabilistic map of the intermediate orolateral fiber masses of the internal intermediate fiber masses of the amygdala (IF.iol) (v8.2): <https://search.kg.ebrains.eu/instances/6cb21576-2ebf-4ba6-b715-a1a1abed289e>

Probabilistic map of the Lamella dorsalis of the internal intermediate fiber masses of the amygdala (IF.ld) (v8.2): <https://search.kg.ebrains.eu/instances/145fd4de-84bb-4b98-a43c-6f6f6a6ef5b4>

Probabilistic map of the intermediate caudomedial fiber masses of the internal medial fiber masses of the amygdala (MF.icm) (v8.2): <https://search.kg.ebrains.eu/instances/c50453fa-3e85-471d-a128-9143a31855dc>

Probabilistic map of the Lamella medialis of the internal medial fiber masses of the amygdala (MF.lm) (v8.2): <https://search.kg.ebrains.eu/instances/af25c1b0-94d1-4ff2-9ab9-1a735038171c>

#### **BigBrain Datasets (mesial piriform region):**

Reference delineations of allocortical PirTBd of the mesial piriform region in the BigBrain: <https://search.kg.ebrains.eu/instances/c3e2b016-dfa2-48f4-b89a-33e0d9cb22a3>

Reference delineations of allocortical PirTBv of the mesial piriform region in the BigBrain: <https://search.kg.ebrains.eu/instances/630a7e78-8879-4207-8409-a2a75ffd95f8>

Reference delineations of periallocortical PirTit of the mesial piriform region in the BigBrain: <https://search.kg.ebrains.eu/instances/95fb3fee-b4b6-4eda-97db-76c2c07fac0c>

Reference delineations of periallocortical PirTu of the mesial piriform region in the BigBrain: <https://search.kg.ebrains.eu/instances/60bd6360-f787-4cb6-abcf-cfb823c85767>

3D cytoarchitectonic map of the human mesial piriform region of the BigBrain (v2.0): <https://search.kg.ebrains.eu/instances/788e0f87-22d2-44e5-b096-9e767a0c9c60>

#### **BigBrain Datasets (amygdala):**



---

Reference delineations of the amygdalostriatal transition zone in individual sections of the BigBrain (v1):

<https://search.kg.ebrains.eu/instances/24ff7ea7-064c-490c-8dfb-31da6c7a68ab>

Reference delineations of the centromedial amygdaloid group in individual sections of the BigBrain (v1):

<https://search.kg.ebrains.eu/instances/7953505c-095f-43fa-a1b1-53fd65f4bfbf>

Reference delineations of the laterobasal amygdaloid group in individual sections of the BigBrain (v1):

<https://search.kg.ebrains.eu/instances/c04fa2a3-fb1e-486a-9069-92081b85b210>

Reference delineations of the superficial amygdaloid group in individual sections of the BigBrain (v1):

<https://search.kg.ebrains.eu/instances/5a4e5a04-5d10-4f88-ac01-30409e3d67e0>

Reference delineations of the internal medial fiber masses of the amygdala in individual sections of the BigBrain (v1):

<https://search.kg.ebrains.eu/instances/d2292a19-6af1-4d99-b5a8-0319a10d23b9>

Reference delineations of the internal intermediate fiber masses of the amygdala in individual sections of the BigBrain

(v1): <https://search.kg.ebrains.eu/instances/70b450e1-a96b-4a00-8442-e3628970d73b>

Reference delineations of the ventromedial tract of the Stria terminalis in the individual sections of the BigBrain (v1):

<https://search.kg.ebrains.eu/instances/a61a3323-1188-46c3-91cc-6bb197df3067>

Ultrahigh resolution 3D cytoarchitectonic map of the human amygdala created by a Deep-Learning assisted workflow (v2.0): <https://search.kg.ebrains.eu/instances/cb40a501-b155-4c2f-8df3-0ee7c5f1ed00>
